# Supplementary material
Source: PubMed Central journal article supplement (PMC7196024)
Supplement: NIHMS1567738-supplement-1.pdf [file NIHMS1567738-supplement-1.pdf]

# Supplemental Data for BamA is required for autotransporter secretion

David Ryoo<sup>†</sup>, Marcella Orwick Rydmark<sup>‡</sup>, Yui Tik Pang<sup>‡</sup>, Karl P. Lundquist<sup>§</sup>, Dirk Linke<sup>‡</sup>, and James C. Gumbart<sup>‡\*</sup>

<sup>†</sup> Interdisciplinary Bioengineering Graduate Program, Georgia Institute of Technology, Atlanta, GA 30332

<sup>‡</sup> School of Physics, Georgia Institute of Technology, Atlanta, GA 30313

<sup>§</sup> Department of Biological Sciences, Purdue University, West Lafayette, IN 47907

<sup>‡</sup> Department of Biosciences, University of Oslo, Oslo, Norway

\* To whom correspondence should be addressed; Email: [gumbart@physics.gatech.edu](mailto:gumbart@physics.gatech.edu);  
Phone: 404-385-0797

Table S1: Lipid compositions of YadA-M systems [62, 63]

| Lipid                  | Upper or Lower | Number of Lipids |
|------------------------|----------------|------------------|
| Y. pestis LPS (Type B) | Upper          | 34               |
| DGPE                   | Lower          | 1                |
| DGPG                   | Lower          | 1                |
| DLIPE                  | Lower          | 1                |
| DLPE                   | Lower          | 1                |
| DMPA                   | Lower          | 1                |
| DMPE                   | Lower          | 5                |
| DMPG                   | Lower          | 3                |
| DOPE                   | Lower          | 2                |
| DOPG                   | Lower          | 1                |
| DPPA                   | Lower          | 2                |
| DPPE                   | Lower          | 20               |
| DPPG                   | Lower          | 12               |
| DPPS                   | Lower          | 1                |
| DSPA                   | Lower          | 2                |
| DSPE                   | Lower          | 19               |
| DSPG                   | Lower          | 12               |
| DSPS                   | Lower          | 1                |
| DYPA                   | Lower          | 1                |
| DYPE                   | Lower          | 7                |
| DYPG                   | Lower          | 4                |
| PMPE                   | Lower          | 5                |
| SLPG                   | Lower          | 1                |

Table S2: Lipid compositions of EspP systems [64, 65]

| Lipid                  | Upper or Lower | Number of Lipids |
|------------------------|----------------|------------------|
| E. coli LPS (Type K12) | Upper          | 42               |
| DPPE                   | Lower          | 90               |
| PVPG                   | Lower          | 24               |
| PVCL2                  | Lower          | 6                |

Table S3: Simulations for BamA-EspP barrel structure

| Structure   | Source                                                                                | System Size | Runs                   |
|-------------|---------------------------------------------------------------------------------------|-------------|------------------------|
| BamA-LinkSt | BamA barrel (PDB ID: 5L0O) [72] and EspP passenger domain from linker-stretched model | 179K atoms  | 302 ns, 303 ns, 309 ns |

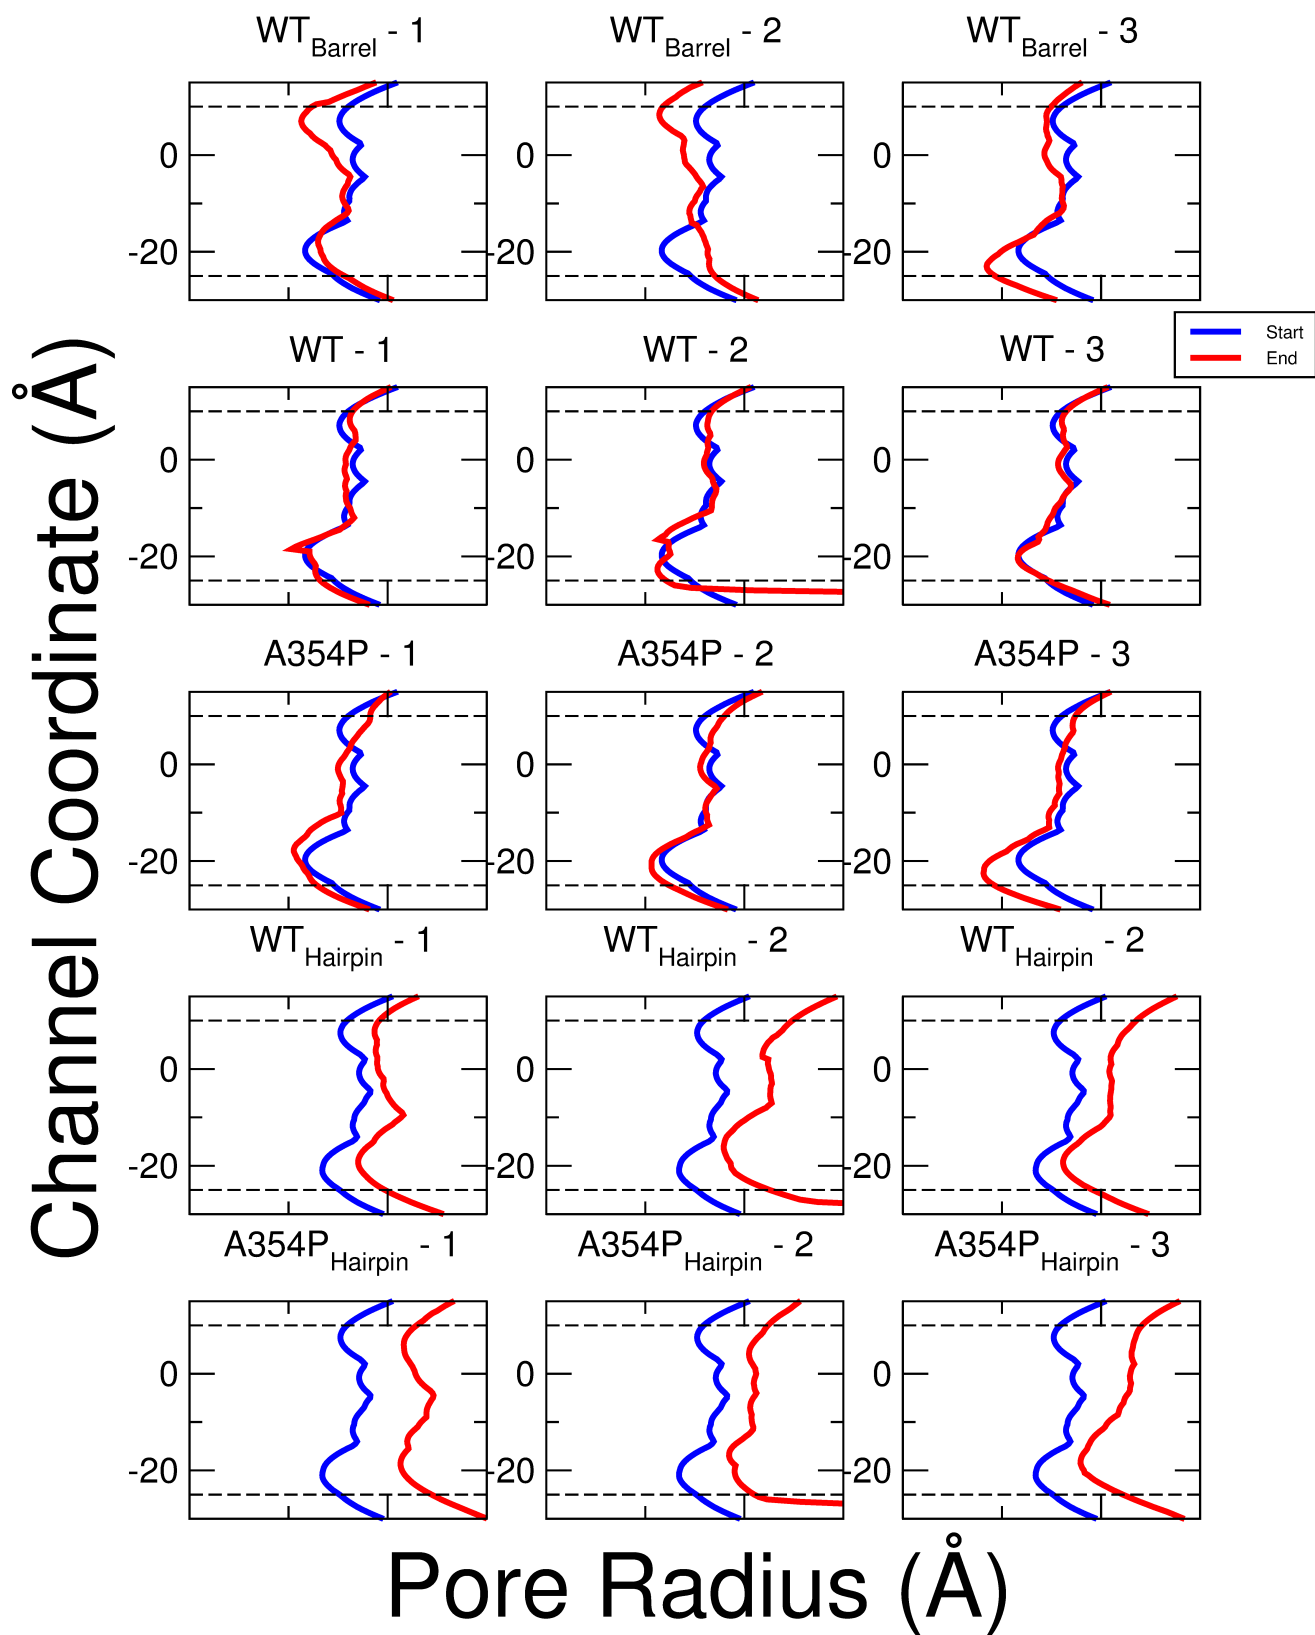

Figure S1: Pore size analysis results of different YadA-M variants

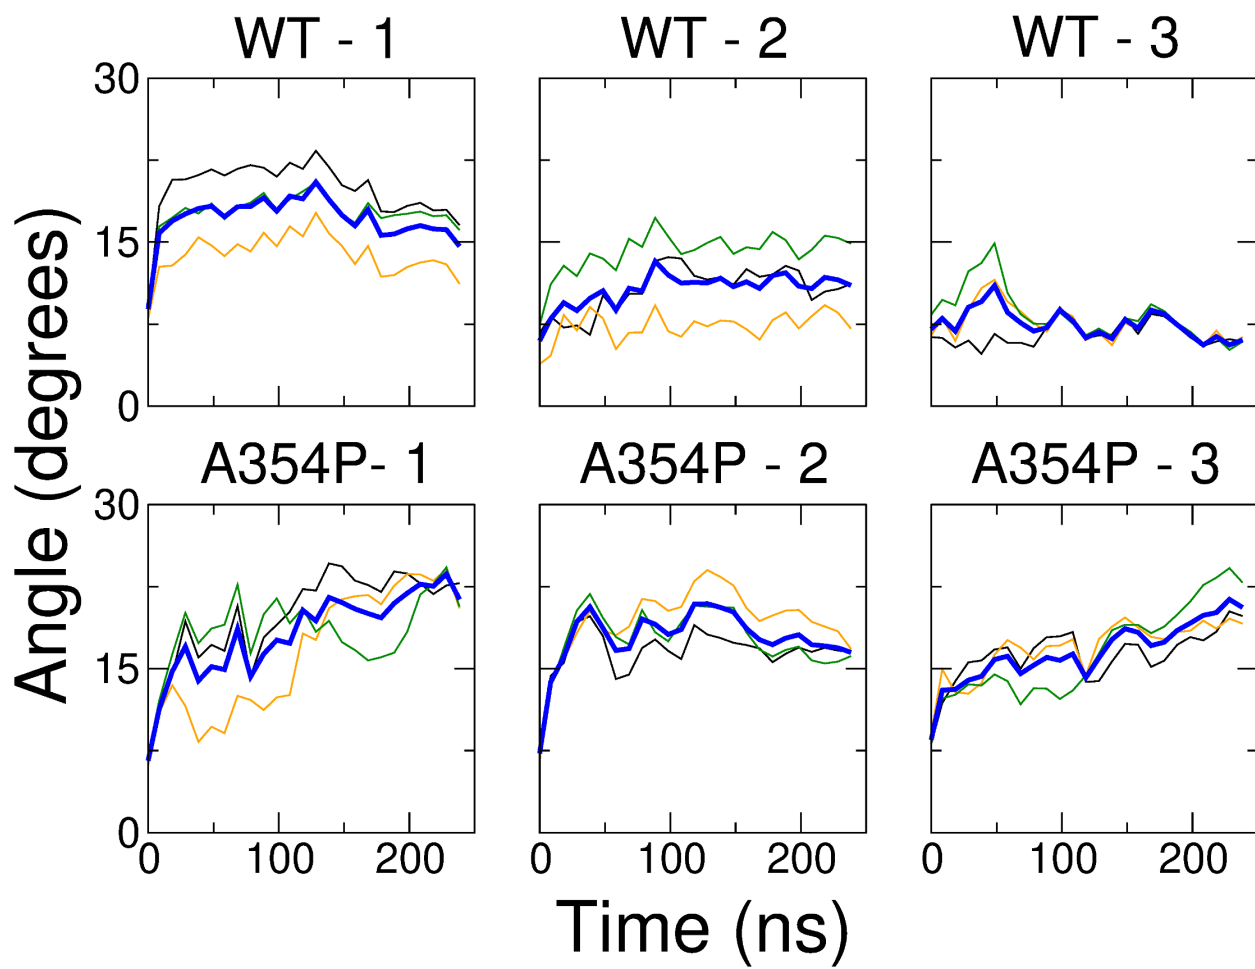

Figure S2: Relative angles formed between the principal axes of each helix pair. The black, green, and orange lines represent the relative angles of each helix and the blue line represent the average. The data shown are running averages taken over 10 ns.

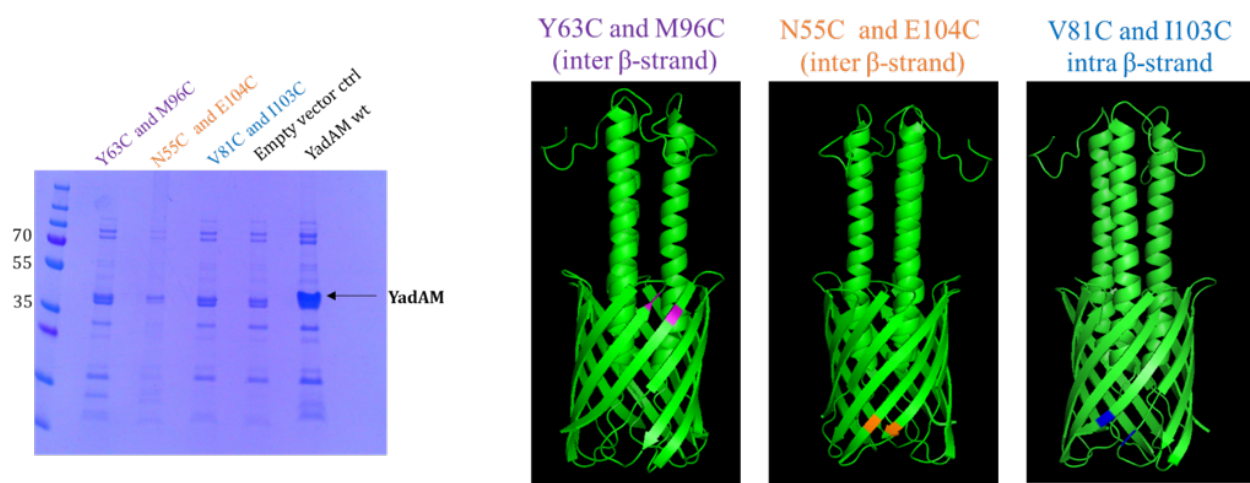

Figure S3: Expression tests for YadAM double-cysteine mutants in a  $\Delta ompFdegP$  deficient strain. YadA-M wt, double-cysteine variants, and an empty vector control were expressed and purified in the OM as described previously [70], with the addition of 10 mM TCEP to the growth medium. The OM samples were run on a 4-20% Tris-glycine gradient gel (NOVEX WedgeWell) without heating.

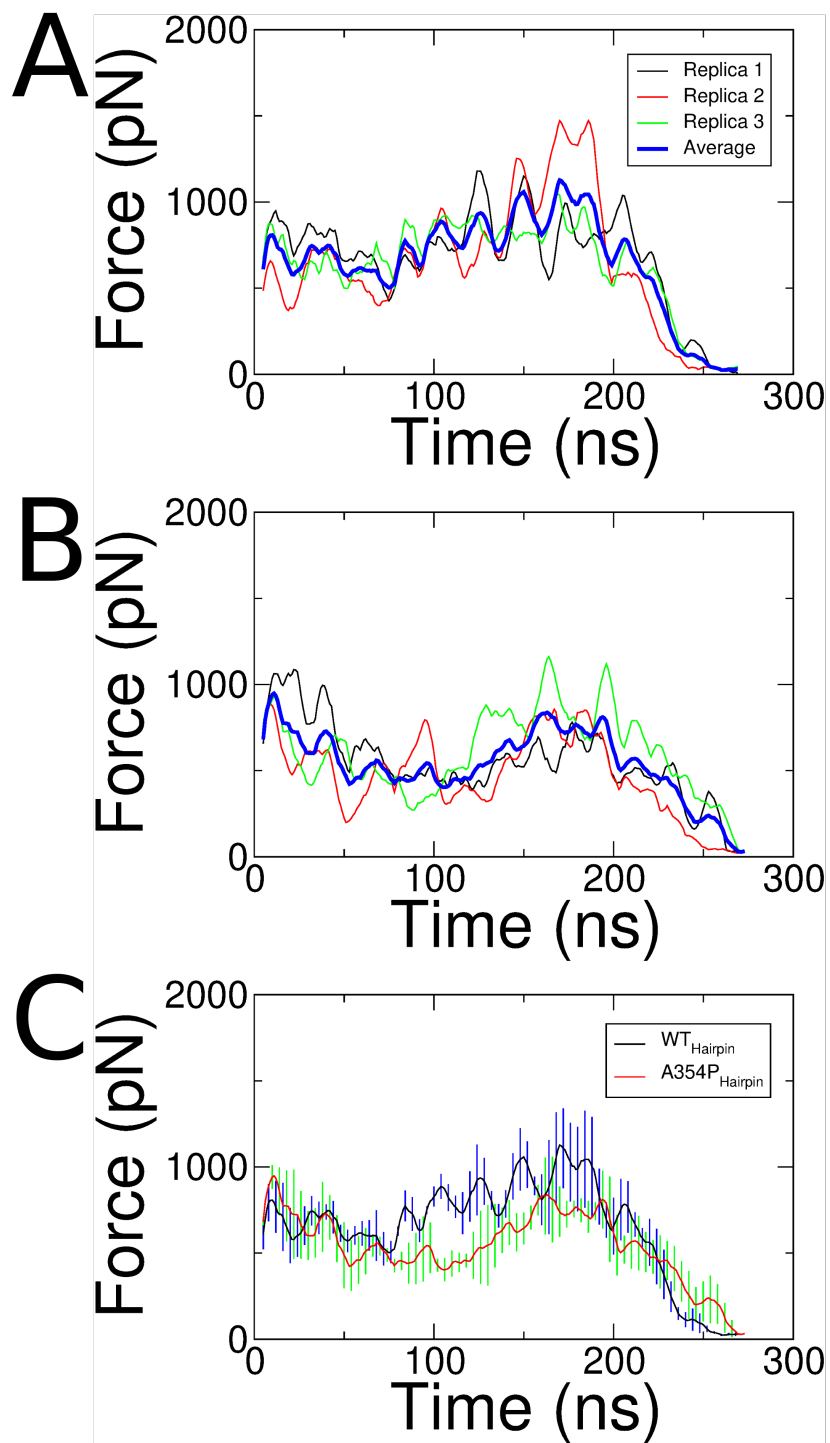

Figure S4: Force vs. time for SMD simulations of A) WT<sub>hairpin</sub> and B) A354P<sub>hairpin</sub>, and C) comparison of the average force vs. time for SMD simulations of secretion for the two YadA variants. The simulations were run at a constant velocity of 1 Å/ns. The error bars for C) are shown in blue for WT<sub>hairpin</sub> and green for A354P<sub>hairpin</sub>.

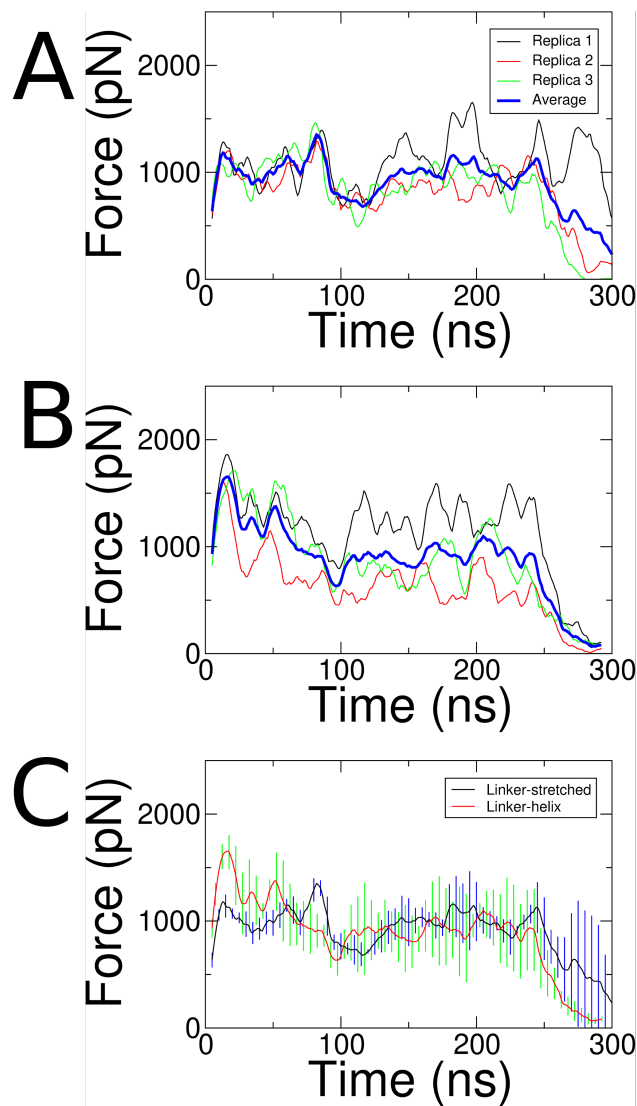

Figure S5: Force vs. time for SMD simulations of secretion using A) linker-stretched and B) linker-helix models, and C) comparison of the average force vs. time for SMD simulations of secretion for the two EspP variants. The simulations were run at a constant velocity of 1 Å/ns. The error bars for C) are shown in blue for linker-stretched and in green for linker-helix, respectively.



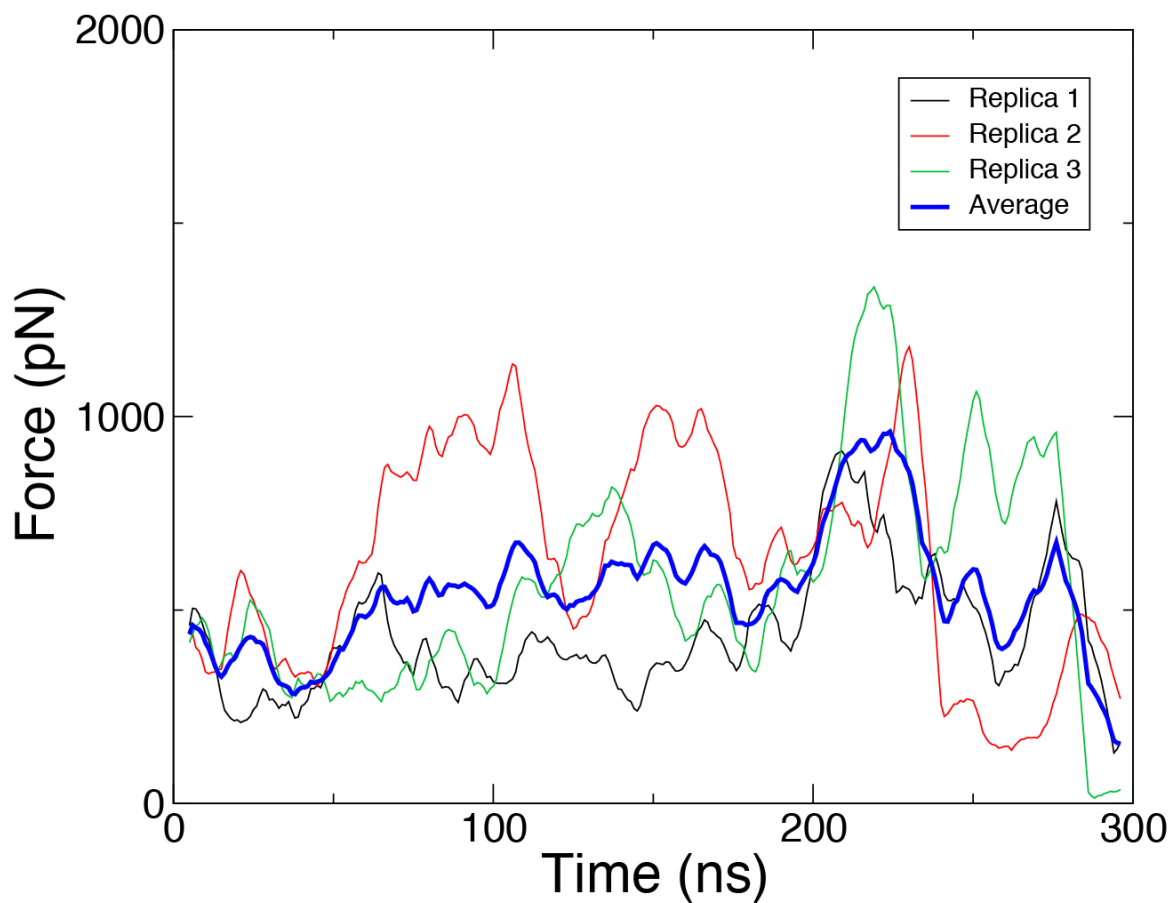

Figure S6: Force vs. time for SMD simulations of BamA structures with EspP passenger domain. The simulations were run at a constant velocity of 1 Å/ns.

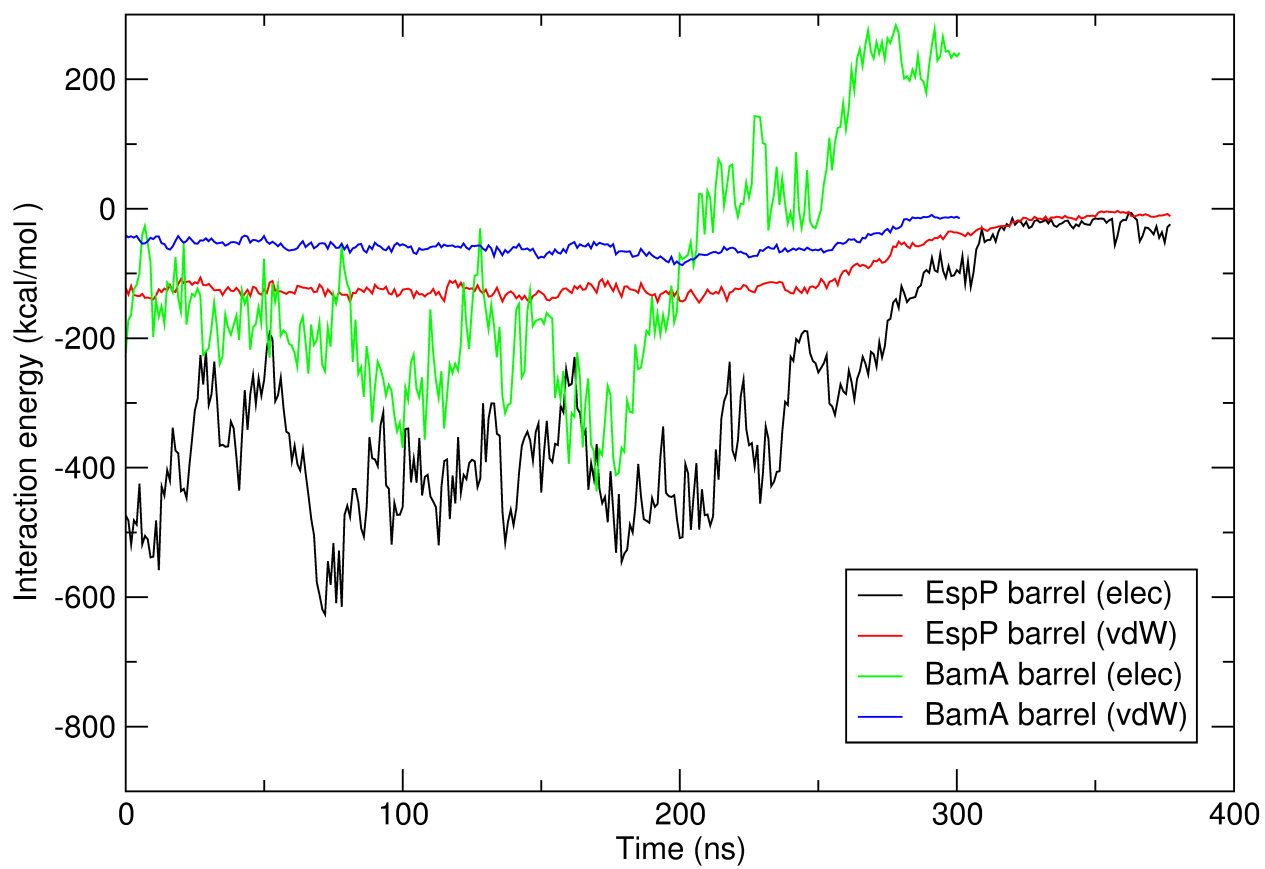

Figure S7: Interaction energy from SMD simulations of EspP structures
